# Supplementary material for: Generation of endogenous pH-sensitive EGF receptor and its application in high-throughput screening for proteins involved in clathrin-mediated endocytosis
Source: eLife journal article supplement (doi:10.7554/elife.46135), 2019-05-08
Supplement: supp [file elife-46135-supp-v1.zip]

Archive with 2 entries (2 files):
- elife_poa_e46135_Figure_4_source_data_1.pdf
- elife_poa_e46135_Transparent_Reporting_File.pdf
