# Supplementary material for: Generation of endogenous pH-sensitive EGF receptor and its application in high-throughput screening for proteins involved in clathrin-mediated endocytosis
Source: eLife journal article supplement (doi:10.7554/elife.46135), 2019-05-08
Supplement: supp [file elife-46135-supp-v1.zip › elife_poa_e46135_Figure_4_source_data_1.pdf]

| Well Name | Well # | Difference from median of controls |        |        | Average | Standard deviation | SSMD    | GeneSymbol           | Genelid | GeneAccession | GINumber  |
|-----------|--------|------------------------------------|--------|--------|---------|--------------------|---------|----------------------|---------|---------------|-----------|
|           |        | 1st                                | 2nd    | 3rd    |         |                    |         |                      |         |               |           |
| E01       | 49     | -1.266                             | -1.134 | -1.060 | -1.153  | 0.104              | -6.248  | Dynamin-2            |         |               |           |
| F01       | 61     | -1.246                             | -1.127 | -1.033 | -1.135  | 0.107              | -6.012  | Dynamin-2            |         |               |           |
| E12       | 60     | -1.211                             | -1.111 | -1.053 | -1.125  | 0.080              | -7.940  | Dynamin-2            |         |               |           |
| F12       | 72     | -1.221                             | -1.100 | -1.040 | -1.120  | 0.092              | -6.854  | Dynamin-2            |         |               |           |
| G12       | 84     | -1.024                             | -0.691 | -0.905 | -0.873  | 0.169              | -2.914  | Clathrin heavy chain |         |               |           |
| H12       | 96     | -1.044                             | -0.586 | -0.889 | -0.840  | 0.233              | -2.035  | Clathrin heavy chain |         |               |           |
| G01       | 73     | -0.932                             | -0.604 | -0.887 | -0.807  | 0.178              | -2.559  | Clathrin heavy chain |         |               |           |
| H01       | 85     | -0.952                             | -0.553 | -0.856 | -0.787  | 0.208              | -2.133  | Clathrin heavy chain |         |               |           |
| F09       | 69     | -0.608                             | -0.474 | -0.503 | -0.528  | 0.070              | -4.239  | PPP2R2A              | 5520    | NM_002717     | 32307111  |
| D07       | 43     | -0.382                             | -0.246 | -0.348 | -0.325  | 0.070              | -2.606  | PTPRH                | 5794    | NM_002842     | 67190343  |
| E08       | 56     | -0.297                             | -0.334 | -0.291 | -0.307  | 0.023              | -7.494  | INPP4A               | 3631    | NM_001566     | 4504704   |
| E06       | 54     | -0.356                             | -0.236 | -0.313 | -0.302  | 0.061              | -2.793  | PR48                 | 28227   | NM_199326     | 41349490  |
| D09       | 45     | -0.269                             | -0.269 | -0.297 | -0.278  | 0.016              | -9.780  | FLJ23751             | 92370   | NM_152282     | 22748648  |
| H07       | 91     | -0.309                             | -0.141 | -0.258 | -0.236  | 0.087              | -1.538  | SET                  | 6418    | NM_003011     | 142361523 |
| F05       | 65     | -0.201                             | -0.195 | -0.229 | -0.208  | 0.018              | -6.554  | DKFZP566K0524        | 26095   | NM_001042365  | 109138576 |
| D05       | 41     | -0.214                             | -0.158 | -0.247 | -0.206  | 0.045              | -2.575  | PTPN2                | 5771    | NM_002828     | 18104978  |
| F10       | 70     | -0.196                             | -0.144 | -0.200 | -0.180  | 0.031              | -3.253  | PFKFB3               | 5209    | NM_004566     | 42476167  |
| E04       | 52     | -0.173                             | -0.154 | -0.194 | -0.174  | 0.020              | -5.002  | EYA2                 | 2139    | NM_172110     | 26667229  |
| G02       | 74     | -0.166                             | -0.176 | -0.158 | -0.167  | 0.009              | -10.001 | PTPN11               | 5781    | NM_002834     | 33356176  |
| G09       | 81     | -0.220                             | -0.104 | -0.166 | -0.163  | 0.058              | -1.581  | FLJ22405             | 64419   | NM_022485     | 117938273 |
| F07       | 67     | -0.171                             | -0.158 | -0.157 | -0.162  | 0.008              | -11.419 | G6PC                 | 2538    | NM_000151     | 119393889 |
| B07       | 19     | -0.143                             | -0.156 | -0.173 | -0.157  | 0.015              | -5.907  | MTMR4                | 9110    | NM_004687     | 31377795  |
| F04       | 64     | -0.167                             | -0.155 | -0.142 | -0.155  | 0.013              | -6.943  | PPP1CC               | 5501    | NM_002710     | 4506006   |
| H08       | 92     | -0.134                             | -0.128 | -0.175 | -0.146  | 0.026              | -3.220  | NUDT3                | 11165   | NM_006703     | 37622350  |
| B04       | 16     | -0.109                             | -0.158 | -0.153 | -0.140  | 0.027              | -2.950  | PTPN5                | 84867   | NM_001039970  | 90652860  |
| E02       | 50     | -0.119                             | -0.151 | -0.111 | -0.127  | 0.021              | -3.417  | PHPT1                | 29085   | NM_014172     | 142373598 |
| C03       | 27     | -0.127                             | -0.129 | -0.120 | -0.125  | 0.005              | -14.473 | NUDT14               | 256281  | NM_177533     | 37594466  |
| C11       | 35     | -0.126                             | -0.065 | -0.163 | -0.118  | 0.049              | -1.349  | PPP2R4               | 5524    | NM_178003     | 30065648  |
| B02       | 14     | -0.126                             | -0.113 | -0.086 | -0.108  | 0.020              | -3.030  | SGPP1                | 81537   | NM_030791     | 40254975  |
| F06       | 66     | -0.108                             | -0.101 | -0.103 | -0.104  | 0.003              | -17.617 | NT5C3                | 51251   | NM_016489     | 70608210  |
| G03       | 75     | -0.084                             | -0.111 | -0.105 | -0.100  | 0.014              | -3.961  | PPFIA1               | 8500    | NM_003626     | 29171751  |
| H04       | 88     | -0.121                             | -0.076 | -0.100 | -0.099  | 0.022              | -2.512  | DUSP3                | 1845    | NM_004090     | 37655179  |
| A08       | 8      | -0.116                             | -0.106 | -0.075 | -0.099  | 0.021              | -2.615  | CDC25A               | 993     | NM_201567     | 42490759  |
| F03       | 63     | -0.097                             | -0.115 | -0.083 | -0.098  | 0.016              | -3.451  | DUSP21               | 63904   | NM_022076     | 33942082  |
| H11       | 95     | -0.128                             | -0.067 | -0.096 | -0.097  | 0.031              | -1.794  | CILP                 | 8483    | NM_003613     | 51944961  |
| D03       | 39     | -0.072                             | -0.144 | -0.067 | -0.094  | 0.043              | -1.237  | CTDP1                | 9150    | NM_048368     | 67188549  |
| C06       | 30     | -0.081                             | -0.102 | -0.091 | -0.092  | 0.010              | -4.989  | PTPRD                | 5789    | NM_130393     | 104486447 |
| C09       | 33     | -0.091                             | -0.076 | -0.092 | -0.086  | 0.009              | -5.295  | PSPH                 | 5723    | NM_004577     | 46249387  |
| G08       | 80     | -0.116                             | -0.085 | -0.058 | -0.086  | 0.029              | -1.674  | FLJ25449             | 151649  | NM_144714     | 109627669 |
| E10       | 58     | -0.053                             | -0.117 | -0.081 | -0.084  | 0.032              | -1.492  | PGAM2                | 5224    | NM_000290     | 50593009  |
| H09       | 93     | -0.100                             | -0.110 | -0.041 | -0.083  | 0.037              | -1.259  | NT5C1A               | 84618   | NM_032526     | 14210537  |
| G07       | 79     | -0.092                             | -0.085 | -0.069 | -0.082  | 0.012              | -3.804  | PPP2R3A              | 5523    | NM_002718     | 32967594  |
| F11       | 71     | -0.084                             | -0.077 | -0.073 | -0.078  | 0.006              | -7.842  | PTPN18               | 26469   | NM_014369     | 18375654  |
| C05       | 29     | -0.104                             | -0.076 | -0.053 | -0.078  | 0.025              | -1.725  | DUSP5                | 1847    | NM_004419     | 62865889  |
| F08       | 68     | -0.144                             | -0.036 | -0.053 | -0.077  | 0.058              | -0.750  | ACP2                 | 53      | NM_001610     | 4557009   |
| H06       | 90     | -0.068                             | -0.078 | -0.062 | -0.069  | 0.008              | -4.764  | PTPN6                | 5777    | NM_080548     | 94557302  |
| C04       | 28     | -0.040                             | -0.083 | -0.076 | -0.067  | 0.023              | -1.619  | EYA4                 | 2070    | NM_172103     | 98991762  |
| D06       | 42     | -0.069                             | -0.082 | -0.040 | -0.064  | 0.022              | -1.661  | PIB5PA               | 27124   | NM_001002837  | 50726959  |
| D08       | 44     | -0.013                             | -0.091 | -0.085 | -0.063  | 0.043              | -0.819  | PPM1B                | 5495    | NM_001033556  | 75813617  |
| D04       | 40     | -0.047                             | -0.073 | -0.069 | -0.063  | 0.014              | -2.506  | NUDT15               | 55270   | NM_018283     | 8922791   |
| A10       | 10     | -0.126                             | -0.037 | -0.024 | -0.062  | 0.056              | -0.630  | PFKFB1               | 5207    | NM_002625     | 118582285 |
| G06       | 78     | -0.059                             | -0.034 | -0.088 | -0.060  | 0.027              | -1.260  | PPP3R1               | 5534    | NM_000945     | 45238847  |
| D02       | 38     | -0.052                             | -0.048 | -0.071 | -0.057  | 0.012              | -2.661  | PTPRT                | 11122   | NM_007050     | 148539859 |
| A04       | 4      | -0.072                             | -0.031 | -0.055 | -0.053  | 0.021              | -1.428  | PPP1R3C              | 5507    | NM_005398     | 21314622  |
| F02       | 62     | -0.120                             | 0.004  | -0.027 | -0.048  | 0.064              | -0.419  | PPM1A                | 5494    | NM_021003     | 29557948  |
| H02       | 86     | -0.047                             | -0.081 | -0.013 | -0.047  | 0.034              | -0.787  | DUSP14               | 11072   | NM_007026     | 148596940 |
| G04       | 76     | -0.066                             | -0.052 | -0.021 | -0.047  | 0.023              | -1.142  | PPP1R14B             | 26472   | XM_370630     | 41200335  |
| H05       | 89     | -0.052                             | -0.075 | -0.003 | -0.043  | 0.037              | -0.664  | ILKAP                | 80895   | NM_030768     | 29171685  |
| A01       | 1      | -0.055                             | -0.052 | -0.013 | -0.040  | 0.023              | -0.967  | Non-targeted control |         |               |           |
| E05       | 53     | -0.067                             | -0.030 | 0.006  | -0.030  | 0.037              | -0.465  | DLG1                 | 1739    | NM_001098424  | 148539627 |
| B03       | 15     | -0.053                             | -0.044 | 0.009  | -0.029  | 0.033              | -0.492  | PPP1R3A              | 5506    | NM_002711     | 34304342  |
| D01       | 37     | -0.044                             | -0.006 | -0.037 | -0.029  | 0.020              | -0.825  | Non-targeted control |         |               |           |
| D11       | 47     | -0.030                             | -0.044 | -0.004 | -0.026  | 0.020              | -0.736  | NUDT1                | 4521    | NM_002452     | 40288273  |
| B09       | 21     | -0.093                             | -0.001 | 0.018  | -0.025  | 0.059              | -0.241  | G6PC3                | 92579   | NM_138387     | 24308433  |
| E07       | 55     | -0.025                             | -0.035 | 0.000  | -0.020  | 0.018              | -0.636  | MK-STYX              | 51657   | NM_016086     | 32481212  |
| C10       | 34     | -0.017                             | -0.054 | 0.010  | -0.020  | 0.032              | -0.351  | CDC25C               | 995     | NM_022809     | 125625348 |
| G05       | 77     | -0.017                             | 0.022  | -0.060 | -0.018  | 0.041              | -0.254  | PTPRA                | 5786    | NM_080841     | 125987586 |
| B08       | 20     | -0.015                             | -0.017 | -0.019 | -0.017  | 0.002              | -5.752  | PPP1R1B              | 84152   | NM_181505     | 142371393 |
| H03       | 87     | -0.062                             | 0.008  | 0.016  | -0.013  | 0.043              | -0.168  | SSH1                 | 54434   | NM_018984     | 40254883  |
| C08       | 32     | -0.011                             | 0.003  | -0.016 | -0.008  | 0.010              | -0.458  | MTM1                 | 4534    | NM_000252     | 4557895   |
| B10       | 22     | -0.048                             | -0.020 | 0.047  | -0.007  | 0.049              | -0.079  | FLJ32332             | 132160  | NM_144641     | 21389470  |
| C01       | 25     | -0.012                             | 0.002  | -0.010 | -0.007  | 0.007              | -0.518  | Non-targeted control |         |               |           |
| A12       | 12     | -0.003                             | -0.045 | 0.036  | -0.004  | 0.040              | -0.056  | Non-targeted control |         |               |           |
| A03       | 3      | -0.029                             | -0.023 | 0.046  | -0.002  | 0.042              | -0.025  | DUSP10               | 11221   | NM_144729     | 21536332  |
| D12       | 48     | 0.011                              | -0.002 | -0.005 | 0.001   | 0.009              | 0.093   | Non-targeted control |         |               |           |
| B11       | 23     | -0.027                             | 0.010  | 0.029  | 0.004   | 0.029              | 0.076   | PTPRO                | 5800    | NM_002848     | 13677212  |
| H10       | 94     | -0.055                             | -0.007 | 0.075  | 0.005   | 0.066              | 0.039   | DUSP19               | 142679  | NM_080876     | 31377625  |
| A02       | 2      | -0.042                             | 0.009  | 0.047  | 0.005   | 0.045              | 0.064   | DOT1L                | 84444   | NM_032482     | 163965372 |
| D10       | 46     | 0.008                              | -0.014 | 0.030  | 0.008   | 0.022              | 0.213   | PPP4C                | 5531    | NM_002720     | 4506026   |
| B05       | 17     | -0.033                             | 0.015  | 0.048  | 0.010   | 0.041              | 0.139   | DUSP11               | 8446    | NM_003584     | 4503414   |
| E11       | 59     | -0.005                             | 0.018  | 0.022  | 0.012   | 0.015              | 0.455   | EPM2A                | 7957    | NM_001018041  | 66346727  |
| B01       | 13     | 0.003                              | 0.018  | 0.018  | 0.013   | 0.009              | 0.837   | Non-targeted control |         |               |           |
| G10       | 82     | -0.046                             | 0.055  | 0.045  | 0.018   | 0.055              | 0.183   | INPP5E               | 56623   | NM_019892     | 38327538  |
| E03       | 51     | -0.025                             | 0.006  | 0.075  | 0.019   | 0.051              | 0.205   | PTPN21               | 11099   | NM_007039     | 150418004 |
| C02       | 26     | -0.021                             | 0.036  | 0.048  | 0.021   | 0.037              | 0.324   | ALPL                 | 249     | NM_000478     | 116734716 |
| C12       | 36     | 0.052                              | 0.012  | 0.005  | 0.023   | 0.025              | 0.518   | Non-targeted control |         |               |           |
| A05       | 5      | -0.005                             | 0.005  | 0.074  | 0.024   | 0.043              | 0.320   | CTDSP1               | 58190   | NM_021198     | 10864008  |
| C07       | 31     | 0.039                              | 0.042  | -0.003 | 0.026   | 0.025              | 0.593   | DUSP4                | 1846    | NM_001394     | 58331238  |
| A11       | 11     | 0.004                              | 0.040  | 0.096  | 0.047   | 0.047              | 0.566   | ALPPL2               | 251     | NM_031313     | 157266295 |
| B12       | 24     | 0.049                              | 0.023  | 0.076  | 0.050   | 0.026              | 1.061   | Non-targeted control |         |               |           |
| A09       | 9      | 0.017                              | 0.034  | 0.109  | 0.053   | 0.049              | 0.611   | PPP3CA               | 5530    | NM_000944     | 142369518 |
| G11       | 83     | 0.053                              | 0.049  | 0.095  | 0.066   | 0.025              | 1.474   | KIAA0310             | 9919    | NM_014866     | 124378038 |
| A06       | 6      | 0.086                              | 0.022  | 0.140  | 0.083   | 0.059              | 0.793   | PTPRJ                | 5795    | NM_001098503  | 148728159 |
| E09       | 57     | 0.049                              | 0.086  | 0.117  | 0.084   | 0.034              | 1.404   | PTPN13               | 5783    | NM_006264     | 5453991   |

|     |    |       |       |       |       |       |       |        |        |           |          |
|-----|----|-------|-------|-------|-------|-------|-------|--------|--------|-----------|----------|
| B06 | 18 | 0.057 | 0.107 | 0.132 | 0.098 | 0.038 | 1.458 | PTPDC1 | 138639 | NM_152422 | 30089951 |
| A07 | 7  | 0.067 | 0.059 | 0.172 | 0.099 | 0.063 | 0.888 | NT5M   | 56953  | NM_020201 | 74229030 |

| Difference from median of controls |        |        |        |        |         |                    |         |                      |         |               |           |
|------------------------------------|--------|--------|--------|--------|---------|--------------------|---------|----------------------|---------|---------------|-----------|
| Well Name                          | Well # | 1st    | 2nd    | 3rd    | Average | Standard deviation | SSMD    | GeneSymbol           | Genelid | GeneAccession | GINumber  |
| F01                                | 61     | -1.238 | -1.115 | -1.152 | -1.168  | 0.063              | -10.424 | Dynamin-2            |         |               |           |
| E01                                | 49     | -1.233 | -1.118 | -1.114 | -1.155  | 0.068              | -9.633  | Dynamin-2            |         |               |           |
| E12                                | 60     | -1.198 | -1.076 | -1.142 | -1.139  | 0.061              | -10.536 | Dynamin-2            |         |               |           |
| F12                                | 72     | -1.213 | -1.060 | -1.124 | -1.132  | 0.077              | -8.292  | Dynamin-2            |         |               |           |
| G12                                | 84     | -1.008 | -0.751 | -0.998 | -0.919  | 0.146              | -3.563  | Clathrin heavy chain |         |               |           |
| H12                                | 96     | -1.020 | -0.714 | -0.956 | -0.897  | 0.162              | -3.128  | Clathrin heavy chain |         |               |           |
| H01                                | 85     | -0.960 | -0.622 | -0.907 | -0.830  | 0.181              | -2.580  | Clathrin heavy chain |         |               |           |
| G01                                | 73     | -0.893 | -0.652 | -0.900 | -0.815  | 0.141              | -3.257  | Clathrin heavy chain |         |               |           |
| F09                                | 69     | -0.365 | -0.372 | -0.442 | -0.393  | 0.042              | -5.247  | THTPA                | 79178   | NM_024328     | 54607163  |
| G10                                | 82     | -0.330 | -0.188 | -0.389 | -0.302  | 0.103              | -1.652  | PPP3R2               | 5535    | NM_147180     | 34303920  |
| B05                                | 17     | -0.288 | -0.184 | -0.366 | -0.279  | 0.091              | -1.726  | PPP1R7               | 5510    | NM_002712     | 4506012   |
| F06                                | 66     | -0.256 | -0.167 | -0.197 | -0.207  | 0.045              | -2.594  | DKFZP761G058         | 152926  | NM_152542     | 31542532  |
| C07                                | 31     | -0.209 | -0.124 | -0.283 | -0.205  | 0.079              | -1.456  | PPP1R2               | 5504    | NM_006241     | 34147499  |
| G04                                | 76     | -0.235 | -0.154 | -0.209 | -0.199  | 0.041              | -2.722  | SSH3                 | 54961   | NM_017857     | 24586674  |
| G02                                | 74     | -0.226 | -0.148 | -0.186 | -0.187  | 0.039              | -2.689  | PPP2R5D              | 5528    | NM_006245     | 31083266  |
| C08                                | 32     | -0.143 | -0.203 | -0.195 | -0.180  | 0.033              | -3.132  | WBP11                | 51729   | NM_016312     | 18375679  |
| G09                                | 81     | -0.302 | -0.020 | -0.190 | -0.171  | 0.142              | -0.680  | PPP1R12B             | 4660    | NM_032103     | 14195596  |
| C05                                | 29     | -0.164 | -0.131 | -0.209 | -0.168  | 0.039              | -2.404  | PPP1R1C              | 151242  | NM_001080545  | 122937385 |
| D03                                | 39     | -0.187 | -0.092 | -0.179 | -0.153  | 0.052              | -1.646  | BPNT1                | 10380   | NM_006085     | 116812594 |
| B03                                | 15     | -0.181 | -0.083 | -0.178 | -0.147  | 0.056              | -1.495  | PTPN14               | 5784    | NM_005401     | 34328898  |
| H06                                | 90     | -0.177 | -0.067 | -0.176 | -0.140  | 0.063              | -1.255  | NT5E                 | 4907    | NM_002526     | 4505466   |
| H08                                | 92     | -0.162 | -0.108 | -0.150 | -0.140  | 0.029              | -2.766  | MTMR6                | 9107    | NM_004685     | 134142347 |
| A06                                | 6      | -0.188 | -0.089 | -0.135 | -0.137  | 0.049              | -1.573  | NT5C                 | 30833   | NM_014595     | 7657032   |
| D09                                | 45     | -0.136 | -0.050 | -0.212 | -0.132  | 0.081              | -0.922  | PPP2R1B              | 5519    | NM_181699     | 124269711 |
| A09                                | 9      | -0.192 | -0.064 | -0.132 | -0.129  | 0.064              | -1.143  | PTPN23               | 25930   | NM_015466     | 110681717 |
| B04                                | 16     | -0.123 | -0.102 | -0.139 | -0.121  | 0.019              | -3.632  | PPP2R2B              | 5521    | NM_181676     | 32307116  |
| F04                                | 64     | -0.143 | -0.099 | -0.100 | -0.114  | 0.025              | -2.577  | DUSP15               | 128853  | NM_177991     | 29826316  |
| C06                                | 30     | -0.098 | -0.061 | -0.168 | -0.109  | 0.054              | -1.133  | PTP4A3               | 11156   | NM_007079     | 14589853  |
| B07                                | 19     | -0.213 | -0.041 | -0.068 | -0.107  | 0.093              | -0.653  | KIAA0377             | 9677    | NM_014659     | 7662083   |
| D10                                | 46     | -0.102 | -0.113 | -0.102 | -0.105  | 0.006              | -9.176  | FBP2                 | 8789    | NM_003837     | 22907027  |
| G07                                | 79     | -0.035 | -0.123 | -0.154 | -0.104  | 0.062              | -0.948  | PTPN4                | 5775    | NM_002830     | 18104987  |
| H05                                | 89     | -0.127 | -0.052 | -0.126 | -0.102  | 0.043              | -1.329  | DUSP18               | 150290  | NM_152511     | 51093844  |
| C02                                | 26     | -0.061 | -0.133 | -0.107 | -0.100  | 0.036              | -1.567  | PPP5C                | 5536    | NM_006247     | 20127496  |
| D04                                | 40     | -0.119 | -0.073 | -0.102 | -0.098  | 0.023              | -2.395  | ACP5                 | 54      | NM_001611     | 161377449 |
| C04                                | 28     | -0.147 | -0.058 | -0.084 | -0.096  | 0.046              | -1.188  | PPAP2C               | 8612    | NM_003712     | 29171743  |
| E08                                | 56     | -0.230 | -0.018 | -0.039 | -0.096  | 0.117              | -0.463  | PPP1R12A             | 4659    | NM_002480     | 4505316   |
| F05                                | 65     | -0.106 | -0.087 | -0.092 | -0.095  | 0.010              | -5.456  | PPP1R13B             | 23368   | NM_015316     | 121114286 |
| E02                                | 50     | -0.100 | -0.062 | -0.120 | -0.094  | 0.029              | -1.795  | PPFIA4               | 8497    | NM_015053     | 55769553  |
| F02                                | 62     | -0.117 | -0.039 | -0.109 | -0.088  | 0.043              | -1.161  | NUDT4                | 11163   | NM_019094     | 98985815  |
| A08                                | 8      | -0.092 | -0.089 | -0.046 | -0.075  | 0.026              | -1.662  | PPP2R1A              | 5518    | NM_014225     | 32455242  |
| C09                                | 33     | -0.071 | -0.007 | -0.137 | -0.072  | 0.065              | -0.625  | PPP1R1A              | 5502    | NM_006741     | 155030237 |
| F07                                | 67     | -0.090 | -0.060 | -0.060 | -0.070  | 0.017              | -2.321  | MTMR7                | 9108    | NM_004686     | 142379887 |
| E03                                | 51     | -0.093 | -0.026 | -0.079 | -0.066  | 0.035              | -1.061  | IGBP1                | 3476    | NM_001551     | 48375183  |
| D05                                | 41     | -0.151 | -0.040 | -0.006 | -0.065  | 0.076              | -0.487  | INPP5A               | 3632    | NM_005539     | 109702905 |
| C11                                | 35     | -0.140 | 0.015  | -0.063 | -0.063  | 0.078              | -0.458  | PTPLB                | 201562  | NM_198402     | 158819030 |
| D08                                | 44     | -0.047 | -0.064 | -0.067 | -0.059  | 0.011              | -3.152  | PPM1F                | 9647    | NM_014634     | 29826333  |
| F03                                | 63     | -0.051 | -0.038 | -0.076 | -0.055  | 0.019              | -1.647  | PTPN1                | 5770    | NM_002827     | 18104977  |
| H11                                | 95     | -0.059 | -0.031 | -0.074 | -0.054  | 0.022              | -1.407  | Empty                |         |               |           |
| D06                                | 42     | -0.049 | -0.017 | -0.088 | -0.051  | 0.035              | -0.821  | PPM1E                | 22843   | NM_014906     | 30089947  |
| E06                                | 54     | -0.050 | -0.065 | -0.034 | -0.049  | 0.015              | -1.816  | PPP1R8               | 5511    | NM_014110     | 20336237  |
| E04                                | 52     | -0.096 | -0.009 | -0.030 | -0.045  | 0.045              | -0.559  | DUSP13               | 51207   | NM_016364     | 56237017  |
| F08                                | 68     | -0.067 | -0.039 | -0.025 | -0.044  | 0.021              | -1.154  | CTDSP2               | 10106   | NM_005730     | 93004101  |
| C10                                | 34     | -0.015 | -0.056 | -0.051 | -0.041  | 0.022              | -1.023  | SGPP2                | 130367  | NM_152386     | 23510288  |
| A01                                | 1      | -0.054 | -0.035 | -0.031 | -0.040  | 0.012              | -1.897  | Non-targeted control |         |               |           |
| G03                                | 75     | -0.019 | -0.046 | -0.053 | -0.039  | 0.018              | -1.219  | ACPP                 | 55      | NM_001099     | 161377405 |
| A11                                | 11     | -0.058 | -0.031 | -0.022 | -0.037  | 0.019              | -1.107  | PPAP2B               | 8613    | NM_003713     | 29171739  |
| F10                                | 70     | -0.019 | -0.015 | -0.077 | -0.037  | 0.035              | -0.603  | DUSP22               | 56940   | NM_020185     | 34147625  |
| E05                                | 53     | -0.050 | -0.007 | -0.052 | -0.036  | 0.026              | -0.801  | SBF1                 | 6305    | NM_002972     | 37574611  |
| D11                                | 47     | -0.045 | -0.025 | -0.034 | -0.035  | 0.010              | -2.010  | DUSP7                | 1849    | NM_001947     | 85662716  |
| D01                                | 37     | -0.027 | -0.033 | -0.036 | -0.032  | 0.004              | -4.233  | Non-targeted control |         |               |           |
| E09                                | 57     | -0.123 | 0.034  | 0.001  | -0.030  | 0.083              | -0.202  | C9ORF67              | 84814   | NM_032728     | 34147435  |
| H04                                | 88     | -0.040 | 0.008  | -0.054 | -0.029  | 0.032              | -0.500  | PTPRG                | 5793    | NM_002841     | 18860897  |
| H03                                | 87     | -0.004 | -0.004 | -0.072 | -0.027  | 0.039              | -0.387  | PPFIA3               | 8541    | NM_003660     | 41872688  |
| H09                                | 93     | 0.011  | -0.025 | -0.056 | -0.023  | 0.033              | -0.392  | PPM1G                | 5496    | NM_002707     | 29826283  |
| B11                                | 23     | -0.036 | -0.002 | -0.025 | -0.021  | 0.017              | -0.688  | PPP6C                | 5537    | NM_002721     | 20127429  |
| C01                                | 25     | -0.006 | -0.020 | -0.033 | -0.020  | 0.013              | -0.845  | Non-targeted control |         |               |           |
| A07                                | 7      | 0.008  | -0.031 | -0.035 | -0.019  | 0.024              | -0.456  | PPM2C                | 54704   | NM_018444     | 8923959   |
| B09                                | 21     | -0.015 | -0.004 | -0.034 | -0.017  | 0.016              | -0.635  | TENS1                | 64759   | NM_022748     | 134152712 |
| G05                                | 77     | -0.008 | 0.005  | -0.049 | -0.017  | 0.028              | -0.345  | LPPR4                | 9890    | NM_014839     | 45827807  |
| G06                                | 78     | 0.013  | -0.047 | -0.016 | -0.017  | 0.030              | -0.315  | PTPN22               | 26191   | NM_012411     | 15619017  |
| D07                                | 43     | -0.009 | -0.023 | -0.014 | -0.015  | 0.007              | -1.208  | FBP1                 | 2203    | NM_000507     | 160298191 |
| G11                                | 83     | -0.037 | 0.002  | 0.009  | -0.009  | 0.025              | -0.198  | CDC14B               | 8555    | NM_001077181  | 116008457 |
| B01                                | 13     | -0.015 | -0.004 | -0.008 | -0.009  | 0.006              | -0.885  | Non-targeted control |         |               |           |
| H10                                | 94     | -0.042 | -0.008 | 0.036  | -0.005  | 0.039              | -0.072  | ALPP                 | 250     | NM_001632     | 94721245  |
| A03                                | 3      | 0.000  | -0.015 | 0.010  | -0.001  | 0.013              | -0.063  | G6PC2                | 57818   | NM_001081686  | 126273545 |
| H02                                | 86     | -0.016 | -0.007 | 0.022  | 0.000   | 0.020              | -0.006  | NUDT5                | 11164   | NM_014142     | 37594463  |
| F11                                | 71     | 0.040  | -0.017 | -0.023 | 0.000   | 0.035              | 0.000   | PTPRR                | 5801    | NM_002849     | 19743915  |
| C03                                | 27     | 0.009  | 0.000  | -0.006 | 0.001   | 0.007              | 0.089   | TPTE2                | 93492   | NM_130785     | 40549428  |
| G08                                | 80     | 0.045  | -0.008 | -0.026 | 0.004   | 0.037              | 0.055   | PPFIBP2              | 8495    | NM_003621     | 57163846  |
| E11                                | 59     | -0.050 | 0.058  | 0.023  | 0.011   | 0.055              | 0.109   | CDC25B               | 994     | NM_004358     | 47078250  |
| E10                                | 58     | -0.044 | 0.042  | 0.068  | 0.022   | 0.059              | 0.210   | NUDT12               | 83594   | NM_031438     | 37574615  |
| D12                                | 48     | 0.006  | 0.041  | 0.027  | 0.025   | 0.017              | 0.798   | Non-targeted control |         |               |           |
| C12                                | 36     | 0.067  | 0.004  | 0.008  | 0.026   | 0.036              | 0.416   | Non-targeted control |         |               |           |
| A04                                | 4      | -0.029 | 0.075  | 0.034  | 0.027   | 0.052              | 0.290   | PFKFB2               | 5208    | NM_001018053  | 64762444  |
| A12                                | 12     | 0.060  | 0.005  | 0.019  | 0.028   | 0.028              | 0.558   | Non-targeted control |         |               |           |
| A02                                | 2      | 0.029  | 0.028  | 0.048  | 0.035   | 0.011              | 1.747   | ACP6                 | 51205   | NM_016361     | 151301212 |
| B06                                | 18     | 0.036  | 0.041  | 0.052  | 0.043   | 0.008              | 3.099   | SSH2                 | 85464   | NM_033389     | 37674209  |
| B10                                | 22     | 0.049  | 0.061  | 0.045  | 0.052   | 0.008              | 3.452   | PON2                 | 5445    | NM_001018161  | 66529395  |
| B08                                | 20     | 0.010  | 0.045  | 0.103  | 0.053   | 0.047              | 0.635   | LCK                  | 3932    | NM_001042771  | 112789547 |
| B12                                | 24     | 0.041  | 0.025  | 0.097  | 0.054   | 0.038              | 0.810   | Non-targeted control |         |               |           |
| A10                                | 10     | 0.021  | 0.044  | 0.102  | 0.055   | 0.042              | 0.749   | CDKN3                | 1033    | NM_005192     | 17981703  |
| E07                                | 55     | 0.020  | 0.078  | 0.118  | 0.072   | 0.049              | 0.828   | NTSC1B               | 93034   | NM_033253     | 50593107  |
| H07                                | 91     | 0.084  | 0.054  | 0.109  | 0.082   | 0.027              | 1.689   | PPM1L                | 151742  | NM_139245     | 63003904  |
| D02                                | 38     | 0.081  | 0.064  | 0.117  | 0.087   | 0.027              | 1.809   | ALPI                 | 248     | NM_001631     | 157266291 |

|     |    |       |       |       |       |       |       |        |      |           |          |
|-----|----|-------|-------|-------|-------|-------|-------|--------|------|-----------|----------|
| B02 | 14 | 0.078 | 0.113 | 0.088 | 0.093 | 0.018 | 2.907 | IMPA2  | 3613 | NM_014214 | 7657235  |
| A05 | 5  | 0.106 | 0.081 | 0.174 | 0.120 | 0.048 | 1.407 | PFKFB4 | 5210 | NM_004567 | 19923257 |

|           |        | Difference from median of controls |        |        | Average | Standard deviation | SSMD    | GeneSymbol           | Geneld | GeneAccession | GINumber  |
|-----------|--------|------------------------------------|--------|--------|---------|--------------------|---------|----------------------|--------|---------------|-----------|
| Well Name | Well # | 1st                                | 2nd    | 3rd    |         |                    |         |                      |        |               |           |
| E01       | 49     | -1.174                             | -1.149 | -1.219 | -1.181  | 0.036              | -18.749 | Dynamin-2            |        |               |           |
| F01       | 61     | -1.155                             | -1.105 | -1.230 | -1.163  | 0.063              | -10.428 | Dynamin-2            |        |               |           |
| E12       | 60     | -1.188                             | -1.072 | -1.213 | -1.158  | 0.075              | -8.661  | Dynamin-2            |        |               |           |
| F12       | 72     | -1.130                             | -1.103 | -1.239 | -1.157  | 0.072              | -9.083  | Dynamin-2            |        |               |           |
| H12       | 96     | -0.998                             | -0.730 | -1.018 | -0.915  | 0.160              | -3.217  | Clathrin heavy chain |        |               |           |
| G12       | 84     | -0.985                             | -0.664 | -1.068 | -0.906  | 0.214              | -2.391  | Clathrin heavy chain |        |               |           |
| G01       | 73     | -0.874                             | -0.671 | -0.957 | -0.834  | 0.147              | -3.198  | Clathrin heavy chain |        |               |           |
| H01       | 85     | -0.833                             | -0.652 | -0.976 | -0.820  | 0.162              | -2.850  | Clathrin heavy chain |        |               |           |
| G10       | 82     | -0.302                             | -0.360 | -0.510 | -0.391  | 0.107              | -2.059  | INPP5D               | 3635   | NM_005541     | 64085176  |
| E10       | 58     | -0.337                             | -0.205 | -0.271 | -0.271  | 0.066              | -2.315  | PPP2CA               | 5515   | NM_002715     | 57222566  |
| G04       | 76     | -0.212                             | -0.234 | -0.365 | -0.270  | 0.082              | -1.849  | PTPRE                | 5791   | NM_006504     | 40805849  |
| F03       | 63     | -0.337                             | -0.143 | -0.194 | -0.224  | 0.101              | -1.258  | PPP1R15B             | 84919  | NM_032833     | 41282220  |
| H06       | 90     | -0.141                             | -0.172 | -0.260 | -0.191  | 0.062              | -1.744  | PPP2R5B              | 5526   | NM_006244     | 30795206  |
| H07       | 91     | -0.219                             | -0.101 | -0.215 | -0.178  | 0.067              | -1.499  | RNGTT                | 8732   | NM_003800     | 134142827 |
| E09       | 57     | -0.206                             | -0.073 | -0.241 | -0.174  | 0.089              | -1.105  | INPPL1               | 3636   | NM_001567     | 4755141   |
| C11       | 35     | -0.246                             | -0.008 | -0.232 | -0.162  | 0.133              | -0.685  | TIMM50               | 92609  | NM_001001563  | 48526508  |
| C06       | 30     | -0.180                             | -0.089 | -0.202 | -0.157  | 0.060              | -1.475  | PPAP2A               | 8611   | NM_003711     | 29171735  |
| G09       | 81     | -0.138                             | -0.125 | -0.181 | -0.148  | 0.030              | -2.819  | SACM1L               | 22908  | NM_014016     | 7662337   |
| F06       | 66     | -0.117                             | -0.115 | -0.194 | -0.142  | 0.045              | -1.781  | PALD                 | 27143  | NM_014431     | 51100971  |
| F11       | 71     | -0.184                             | -0.043 | -0.191 | -0.139  | 0.083              | -0.945  | PPP3CB               | 5532   | NM_021132     | 11036639  |
| G07       | 79     | -0.101                             | -0.098 | -0.217 | -0.139  | 0.068              | -1.154  | PSPHL                | 8781   | XM_926720     | 89024914  |
| H04       | 88     | -0.100                             | -0.091 | -0.214 | -0.135  | 0.069              | -1.110  | NUDT2                | 318    | NM_001161     | 22265329  |
| H08       | 92     | -0.136                             | -0.111 | -0.139 | -0.129  | 0.015              | -4.754  | PPP1CA               | 5499   | NM_206873     | 45827797  |
| F07       | 67     | -0.076                             | -0.147 | -0.162 | -0.128  | 0.046              | -1.563  | PGAM1                | 5223   | NM_002629     | 31543395  |
| C05       | 29     | -0.096                             | -0.120 | -0.144 | -0.120  | 0.024              | -2.823  | DUSP9                | 1852   | NM_001395     | 4503420   |
| E05       | 53     | -0.153                             | -0.094 | -0.108 | -0.118  | 0.031              | -2.154  | PPP2R5A              | 5525   | NM_006243     | 30795205  |
| G08       | 80     | -0.089                             | -0.097 | -0.161 | -0.116  | 0.040              | -1.646  | DUSP6                | 1848   | NM_001946     | 42764682  |
| H02       | 86     | -0.096                             | -0.102 | -0.144 | -0.114  | 0.026              | -2.469  | PTPRK                | 5796   | NM_002844     | 18860901  |
| E07       | 55     | -0.126                             | -0.063 | -0.139 | -0.109  | 0.041              | -1.514  | DUSP12               | 11266  | NM_007240     | 6005955   |
| B06       | 18     | -0.106                             | -0.075 | -0.139 | -0.107  | 0.032              | -1.878  | DLG7                 | 9787   | NM_014750     | 21361644  |
| C08       | 32     | -0.137                             | -0.017 | -0.143 | -0.099  | 0.071              | -0.790  | INPP4B               | 8821   | NM_001101669  | 156104896 |
| F02       | 62     | -0.116                             | -0.092 | -0.082 | -0.097  | 0.017              | -3.142  | PTPRB                | 5787   | NM_002837     | 157952212 |
| H11       | 95     | -0.081                             | -0.059 | -0.148 | -0.096  | 0.047              | -1.165  | PPP4R1               | 9989   | NM_005134     | 108936951 |
| H05       | 89     | -0.059                             | -0.076 | -0.144 | -0.093  | 0.045              | -1.169  | SKIP                 | 51763  | NM_016532     | 18765708  |
| D11       | 47     | -0.137                             | 0.015  | -0.155 | -0.092  | 0.093              | -0.560  | DUSP1                | 1843   | NM_004417     | 7108342   |
| C09       | 33     | -0.102                             | -0.072 | -0.101 | -0.092  | 0.017              | -3.018  | MTMR3                | 8897   | NM_153051     | 148276975 |
| B09       | 21     | -0.157                             | -0.021 | -0.092 | -0.090  | 0.068              | -0.748  | PPP1CB               | 5500   | NM_002709     | 4506004   |
| E11       | 59     | -0.132                             | -0.015 | -0.114 | -0.087  | 0.063              | -0.784  | TA-PP2C              | 160760 | NM_139283     | 21281678  |
| G03       | 75     | -0.051                             | -0.075 | -0.128 | -0.085  | 0.039              | -1.212  | PTPRN                | 5798   | NM_002846     | 18860905  |
| G06       | 78     | -0.055                             | -0.082 | -0.114 | -0.084  | 0.030              | -1.604  | PTPRS                | 5802   | NM_130853     | 104487294 |
| H03       | 87     | -0.116                             | -0.030 | -0.097 | -0.081  | 0.045              | -1.011  | PPAPDC1              | 196051 | NM_001030059  | 73611919  |
| F04       | 64     | -0.188                             | 0.012  | -0.066 | -0.081  | 0.101              | -0.452  | INPP5B               | 3633   | NM_005540     | 113722124 |
| H09       | 93     | -0.036                             | -0.082 | -0.100 | -0.073  | 0.033              | -1.240  | BPGM                 | 669    | NM_001724     | 40353767  |
| G05       | 77     | -0.052                             | -0.048 | -0.118 | -0.073  | 0.039              | -1.050  | DUSP16               | 80824  | NM_030640     | 38372910  |
| D06       | 42     | -0.060                             | -0.046 | -0.110 | -0.072  | 0.034              | -1.197  | PPP2R5E              | 5529   | NM_006246     | 31083295  |
| H10       | 94     | -0.052                             | -0.051 | -0.103 | -0.069  | 0.030              | -1.314  | PPFIA2               | 8499   | NM_003625     | 29171754  |
| B07       | 19     | -0.021                             | -0.058 | -0.125 | -0.068  | 0.053              | -0.725  | PTPN20A              | 653129 | NM_001042397  | 109138574 |
| F05       | 65     | -0.077                             | -0.052 | -0.055 | -0.061  | 0.014              | -2.510  | PTP4A1               | 7803   | NM_003463     | 62865860  |
| G02       | 74     | -0.029                             | -0.047 | -0.107 | -0.061  | 0.041              | -0.837  | MTMR8                | 55613  | NM_017677     | 21361758  |
| E08       | 56     | -0.061                             | 0.008  | -0.090 | -0.048  | 0.050              | -0.535  | PPP3CC               | 5533   | NM_005605     | 34147659  |
| E02       | 50     | -0.069                             | -0.033 | -0.033 | -0.045  | 0.021              | -1.224  | ACPT                 | 93650  | NM_033068     | 18375509  |
| A06       | 6      | -0.042                             | -0.027 | -0.066 | -0.045  | 0.020              | -1.294  | PTPRU                | 10076  | NM_133178     | 110735403 |
| D01       | 37     | -0.058                             | 0.000  | -0.076 | -0.044  | 0.040              | -0.631  | Non-targeted control |        |               |           |
| F10       | 70     | -0.093                             | 0.004  | -0.036 | -0.041  | 0.049              | -0.482  | PTPRM                | 5797   | NM_002845     | 157419149 |
| D05       | 41     | -0.039                             | -0.031 | -0.052 | -0.040  | 0.010              | -2.183  | PPP2CZ               | 333926 | NM_005167     | 65506327  |
| B08       | 20     | -0.059                             | 0.007  | -0.059 | -0.037  | 0.038              | -0.548  | SYNJ1                | 8867   | NM_003895     | 44921605  |
| B03       | 15     | -0.006                             | -0.053 | -0.045 | -0.035  | 0.025              | -0.788  | PON1                 | 5444   | NM_000446     | 31880793  |
| C01       | 25     | -0.028                             | -0.017 | -0.045 | -0.030  | 0.014              | -1.193  | Non-targeted control |        |               |           |
| B05       | 17     | 0.023                              | -0.058 | -0.052 | -0.029  | 0.045              | -0.360  | PPP2R2D              | 55844  | NM_001003656  | 51093852  |
| F09       | 69     | -0.089                             | 0.033  | -0.008 | -0.021  | 0.062              | -0.195  | SYNJ2                | 8871   | NM_003898     | 52851404  |
| A07       | 7      | 0.028                              | -0.051 | -0.039 | -0.021  | 0.043              | -0.271  | DUSP2                | 1844   | NM_004418     | 12707563  |
| G11       | 83     | 0.016                              | -0.005 | -0.072 | -0.020  | 0.046              | -0.251  | PTEN                 | 5728   | NM_000314     | 110224474 |
| C12       | 36     | -0.019                             | -0.030 | -0.004 | -0.018  | 0.013              | -0.769  | Non-targeted control |        |               |           |
| A08       | 8      | -0.035                             | -0.017 | 0.001  | -0.017  | 0.018              | -0.535  | PPP1R3D              | 5509   | NM_006242     | 37622904  |
| C07       | 31     | -0.003                             | -0.011 | -0.034 | -0.016  | 0.016              | -0.553  | PDP2                 | 57546  | NM_020786     | 41349496  |
| A01       | 1      | -0.025                             | -0.015 | 0.004  | -0.012  | 0.015              | -0.452  | Non-targeted control |        |               |           |
| E06       | 54     | -0.044                             | 0.036  | -0.016 | -0.008  | 0.041              | -0.113  | PTPMT1               | 114971 | NM_175732     | 148224883 |
| E04       | 52     | -0.013                             | 0.030  | -0.030 | -0.004  | 0.031              | -0.074  | PTPLA                | 9200   | NM_014241     | 82659104  |
| B11       | 23     | 0.077                              | -0.007 | -0.072 | -0.001  | 0.075              | -0.005  | IMPA1                | 3612   | NM_005536     | 8393607   |
| C02       | 26     | -0.019                             | 0.001  | 0.016  | -0.001  | 0.017              | -0.018  | PPM1D                | 8493   | NM_003620     | 29558519  |
| B01       | 13     | 0.022                              | 0.020  | -0.031 | 0.004   | 0.030              | 0.068   | Non-targeted control |        |               |           |
| B02       | 14     | 0.077                              | -0.009 | -0.045 | 0.008   | 0.063              | 0.070   | STYX                 | 6815   | NM_145251     | 34222188  |
| D09       | 45     | -0.020                             | 0.002  | 0.045  | 0.009   | 0.033              | 0.155   | MTMR2                | 8898   | NM_016156     | 20357517  |
| E03       | 51     | 0.015                              | 0.023  | -0.003 | 0.012   | 0.013              | 0.509   | PTPRZ1               | 5803   | NM_002851     | 91208427  |
| A11       | 11     | 0.086                              | -0.006 | -0.035 | 0.015   | 0.063              | 0.136   | ENPP7                | 339221 | NM_178543     | 31341740  |
| C03       | 27     | 0.031                              | 0.010  | 0.007  | 0.016   | 0.013              | 0.682   | PTPRC                | 5788   | NM_080923     | 115385974 |
| B04       | 16     | 0.044                              | 0.001  | 0.024  | 0.023   | 0.021              | 0.613   | MGC10067             | 134510 | NM_145049     | 142347678 |
| D08       | 44     | 0.060                              | 0.025  | -0.003 | 0.027   | 0.032              | 0.483   | OCRL                 | 4952   | NM_000276     | 21396493  |
| A03       | 3      | 0.010                              | 0.052  | 0.022  | 0.028   | 0.022              | 0.724   | MINPP1               | 9562   | NM_004897     | 164420775 |
| A05       | 5      | -0.003                             | 0.038  | 0.051  | 0.029   | 0.028              | 0.569   | PTPN12               | 5782   | NM_002835     | 18375651  |
| D02       | 38     | -0.002                             | 0.025  | 0.063  | 0.029   | 0.033              | 0.498   | EYA1                 | 2138   | NM_172059     | 26667218  |
| A10       | 10     | 0.083                              | -0.004 | 0.019  | 0.033   | 0.045              | 0.411   | PGAM4                | 441531 | NM_001029891  | 84370365  |
| D12       | 48     | 0.019                              | 0.035  | 0.049  | 0.034   | 0.015              | 1.277   | Non-targeted control |        |               |           |
| B12       | 24     | 0.062                              | 0.036  | 0.027  | 0.042   | 0.018              | 1.273   | Non-targeted control |        |               |           |
| A12       | 12     | 0.071                              | 0.000  | 0.068  | 0.046   | 0.040              | 0.648   | Non-targeted control |        |               |           |
| F08       | 68     | 0.030                              | 0.097  | 0.022  | 0.050   | 0.041              | 0.682   | NUDT9                | 53343  | NM_024047     | 37594462  |
| C10       | 34     | -0.037                             | 0.116  | 0.105  | 0.061   | 0.086              | 0.403   | ACP1                 | 52     | NM_001040649  | 96304456  |
| D07       | 43     | 0.050                              | 0.055  | 0.078  | 0.061   | 0.015              | 2.356   | PPP2CB               | 5516   | NM_004156     | 57634540  |
| D04       | 40     | 0.058                              | 0.053  | 0.097  | 0.069   | 0.024              | 1.620   | MTMR1                | 8776   | NM_003828     | 88999580  |
| A09       | 9      | 0.095                              | 0.062  | 0.050  | 0.069   | 0.023              | 1.689   | PTP4A2               | 8073   | NM_080392     | 88758598  |
| A02       | 2      | 0.104                              | 0.065  | 0.044  | 0.071   | 0.031              | 1.295   | PPP1R16B             | 26051  | NM_015568     | 34335276  |
| D10       | 46     | 0.063                              | 0.070  | 0.088  | 0.074   | 0.013              | 3.225   | PPEF1                | 5475   | NM_152226     | 23312377  |

|     |    |       |       |       |       |       |       |         |        |           |           |
|-----|----|-------|-------|-------|-------|-------|-------|---------|--------|-----------|-----------|
| B10 | 22 | 0.098 | 0.083 | 0.051 | 0.077 | 0.024 | 1.811 | DUSP8   | 1850   | NM_004420 | 153281157 |
| A04 | 4  | 0.106 | 0.062 | 0.102 | 0.090 | 0.024 | 2.087 | PTPN9   | 5780   | NM_002833 | 18375663  |
| C04 | 28 | 0.045 | 0.087 | 0.140 | 0.091 | 0.048 | 1.074 | PPAPDC2 | 403313 | NM_203453 | 66773039  |
| D03 | 39 | 0.097 | 0.108 | 0.111 | 0.105 | 0.007 | 7.940 | NT5C2   | 22978  | NM_012229 | 20149601  |
